# Supplementary material for: Effect of Borrelia burgdorferi Outer Membrane Vesicles on Host Oxidative Stress Response
Source: Antibiotics (Basel). 2020 May 25;9(5):275. doi: 10.3390/antibiotics9050275 (PMC7277464; doi:10.3390/antibiotics9050275)
Supplement: Supplementary file 1 [file antibiotics-09-00275-s001.pdf]

## Supplementary material

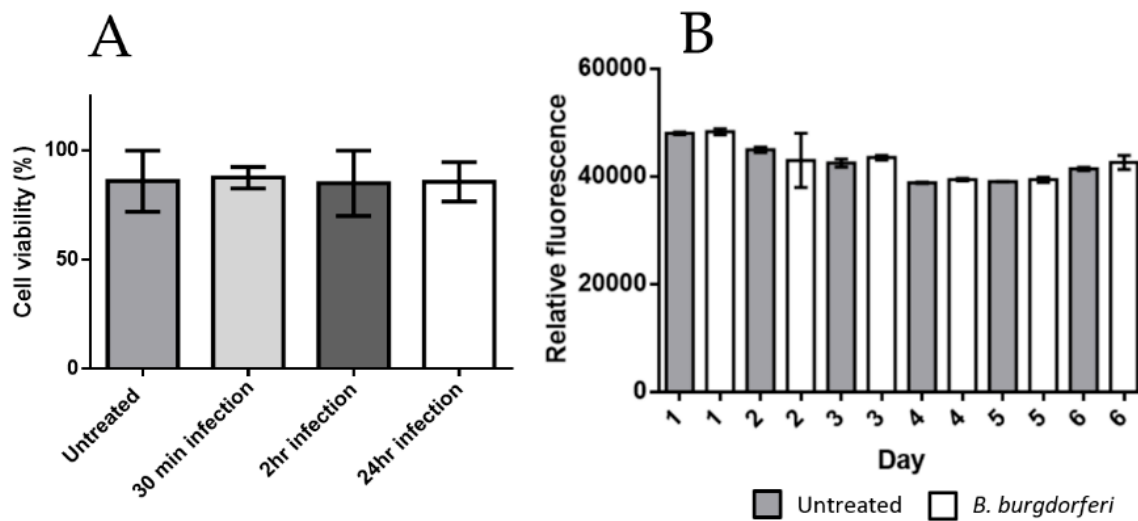

**Figure 1.** BE2C cell viability after co-culture with *B. burgdorferi*. BE2C cells were co-cultured with *B. burgdorferi* for 30 min, 2 h, and 24 h timepoints, after which viability was assessed using trypan blue (A). Additionally, BE2C cell viability after *B. burgdorferi* exposure from 1 to 6 days was assessed using Alamar blue (B). Error bars represent SEM. Trypan blue staining was performed by diluting equal parts BE2C cells Trypan blue. Live and dead cell counting was performed using a hemocytometer. An Alamar blue assay (Thermo Fisher Sci, Cat. no. DAL1100, Waltham, MA) was performed by seeding 15,000 BE2C cells per well in a 24 well plate. Infections were carried out in triplicate from 1-6 days. Alamar blue was added according to the manufacturer's recommendations at the appropriate timepoint. Readings were made 24 h after addition of Alamar blue using a Bio-tek FLX800 plate reader. No significant differences in viability were observed at any infection time point.

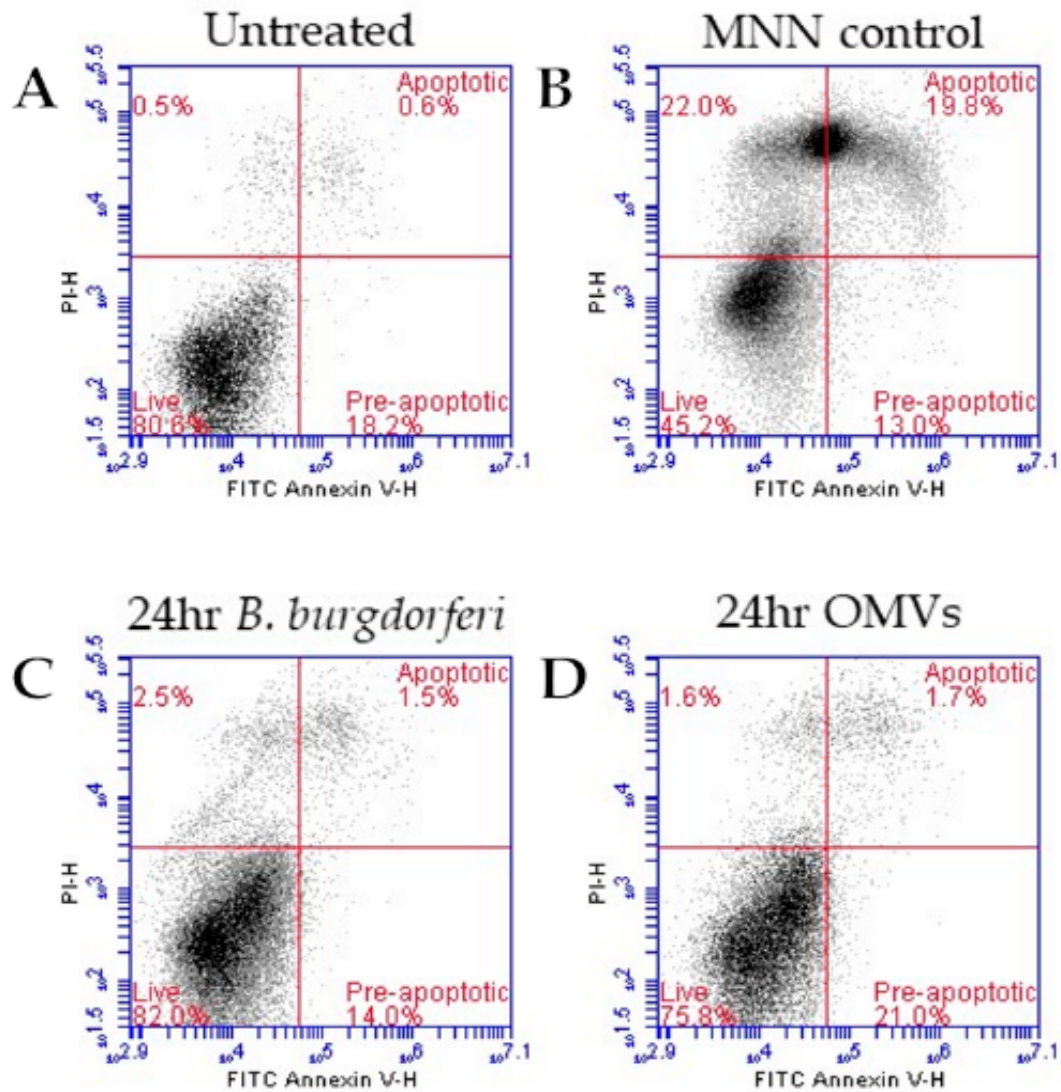

**Figure 2.** Apoptosis in BE2C cells after 24 hours *B. burgdorferi* or OMV co-culture. After exposure to *B. burgdorferi* or OMVs, BE2C cells were stained with PI and FITC-annexin V and assessed on a BD Accuri C6 flow cytometer. Untreated cells were stained with FITC-annexin V (A). Menadione (MNN) was used as a positive control to induce apoptosis (B). Cells co-cultured with *B. burgdorferi* (C) or OMVs (D) for 24 hours showed elevated levels of annexin/PI positive cells compared to the untreated control cells. Mitochondrial SOD2 activity is necessary for a cell's ability to keep oxidative stress in check [1]. Therefore, interruption of normal SOD2 activity leaves cells susceptible to DNA, protein, and lipid membrane damage followed by apoptosis [2]. The reduction in SOD2 observed in this study pointed to potential apoptotic pathway activation in BE2C cells. Gates for regions of no FITC/PI staining (live cells), and positive FITC/PI (apoptotic cells) were established using untreated and MNN control groups, respectively. BE2C cells exposed to *B. burgdorferi* for 24 hours showed 0.9% more apoptotic cells than untreated cells (Figure S2C), while exposure to OMVs proportional to the amount *B. burgdorferi* spirochetes had 1% more apoptotic cells (Figure S2D).

## Reference

1. Kokoszka, J.E.; Coskun, P.; Esposito, L.A.; Wallace, D.C. Increased mitochondrial oxidative stress in the Sod2 (+/-) mouse results in the age-related decline of mitochondrial function culminating in increased apoptosis. *Proc. Natl. Acad. Sci. USA* **2001**, *98*, 2278–2283.
2. Sies, H.; Berndt, C.; Jones, D.P. Oxidative Stress. *Annu. Rev. Biochem.* **2017**, *86*, 715–748.
